# Supplementary material for: A water-based synthetic route to the metal–organic framework UiO-66 starting from PET-derived terephthalate esters
Source: Royal Society of Chemistry journal article supplement (doi:10.1039/d5su00463b), 2025-11-25
Supplement: d5su00463b1.pdf [file d5su00463b1.pdf]

## **A water-based synthetic route to metal-organic framework UiO-66 starting from PET-derived terephthalate esters**

Pietro Agola<sup>a</sup> and Marco Taddei<sup>a,b\*</sup>

<sup>a</sup> *Department of Chemistry and Industrial Chemistry, INSTM research unit, University of Pisa, Via G. Moruzzi 13, 56124 Pisa, Italy.*

<sup>b</sup> *Centro per l'Integrazione della Strumentazione scientifica dell'Università di Pisa (C.I.S.U.P.), Università di Pisa, 56124 Pisa, Italy*

## **ELECTRONIC SUPPLEMENTARY INFORMATION**

## Preliminary synthetic screening

**Table S1.** Results of preliminary screening using 1 mmol DMT and 1 mmol  $\text{ZrOCl}_2 \cdot 8\text{H}_2\text{O}$  in 10 mL total volume. Workup protocol: 10 mL 0.1 M TEA in MeOH, 60 min x 2; 10 mL MeOH, 60 min x 2; 10 mL acetone, 60 min x 1.

| Sample | Temperature<br>(°C) | HCl<br>(eq) | AA<br>(eq) | Time<br>(h) | RME <sup>a</sup><br>(%) | Phase                                   | FWHM <sup>b</sup><br>(°) |
|--------|---------------------|-------------|------------|-------------|-------------------------|-----------------------------------------|--------------------------|
| P1     | 80                  | 10          | 10         | 24          | 34                      | <b>hcp</b>                              | 0.29                     |
| P2     | 90                  | 10          | 10         | 24          | 40                      | <b>hcp</b>                              | 0.25                     |
| P3     | 130                 | 10          | 10         | 24          | 13                      | <b>hcp</b>                              | – <sup>c</sup>           |
| P4     | 90                  | 10          | 0          | 24          | 50                      | <b>hcp</b> + $\text{H}_2\text{BDC}$     | – <sup>d</sup>           |
| P5     | 80                  | 20          | 20         | 24          | 16                      | <b>fcu/reo</b> + $\text{H}_2\text{BDC}$ | – <sup>d</sup>           |
| P6     | 90                  | 20          | 20         | 5           | 20                      | <b>fcu/reo</b>                          | 0.16                     |
| P7     | 100                 | 20          | 20         | 5           | 10                      | <b>fcu/reo</b>                          | 0.17                     |
| P8     | 90                  | 20          | 10         | 24          | 35                      | <b>hcp</b>                              | 0.32                     |
| P9     | 90                  | 20          | 20         | 24          | 23                      | <b>fcu/reo</b>                          | 0.17                     |

<sup>a</sup> Maximum RME obtainable starting from DMT and assuming an ideal defect free product with **fcu** topology of formula  $\text{Zr}_6\text{O}_4(\text{OH})_4(\text{BDC})_6 = 54\%$ . Maximum RME obtainable starting from DMT and assuming a product with **hcp** topology of formula  $\text{Zr}_{12}\text{O}_8(\text{OH})_{14}(\text{BDC})_9 = 47\%$ ; <sup>b</sup> FWHM of reflection 111 for **fcu** phase and reflection 101 for **hcp** phase (both reflections are located at  $7.3^\circ$ ); <sup>c</sup> the 101 reflection is superimposed with the 100 reflection; <sup>d</sup> FWHM not reported for mixed phase systems.

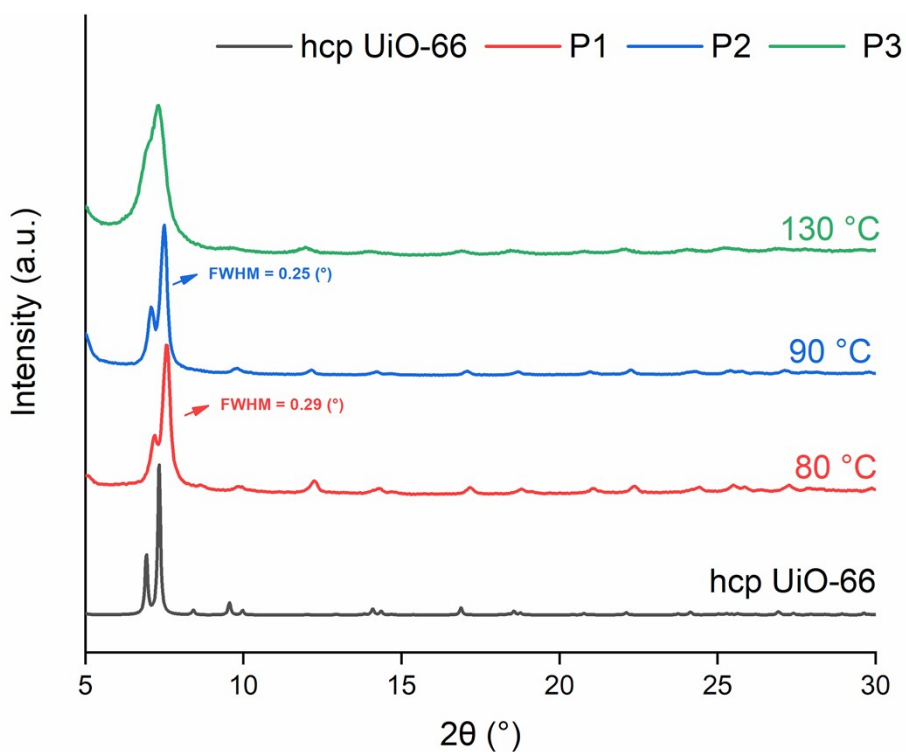

**Figure S1.** PXRD patterns of P1 (red, 80 °C), P2 (blue, 90 °C), P3 (green, 130 °C), compared to the calculated pattern for **hcp** UiO-66 (black). Reaction conditions: 10 eq AA, 10 eq HCl, 24 h.

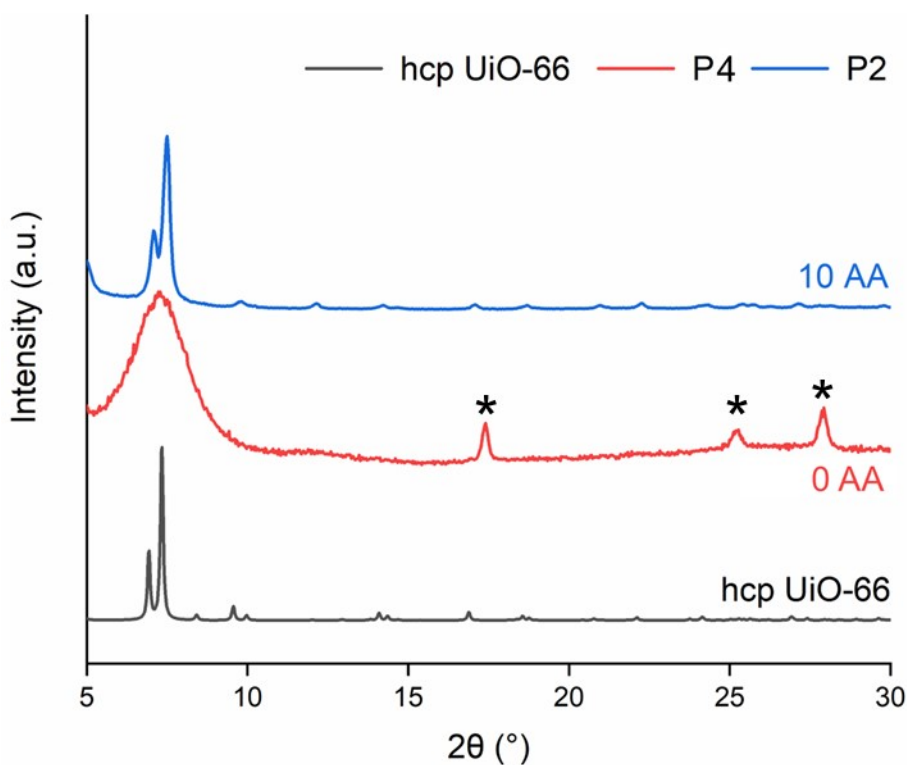

**Figure S2.** PXRD patterns of P4 (red, 0 eq AA) and P2 (blue, 10 eq AA). Reaction conditions: 10 HCl, 24 h, 90 °C. Asterisks (\*) indicate peaks associated with crystallised  $\text{H}_2\text{BDC}$  in P4.

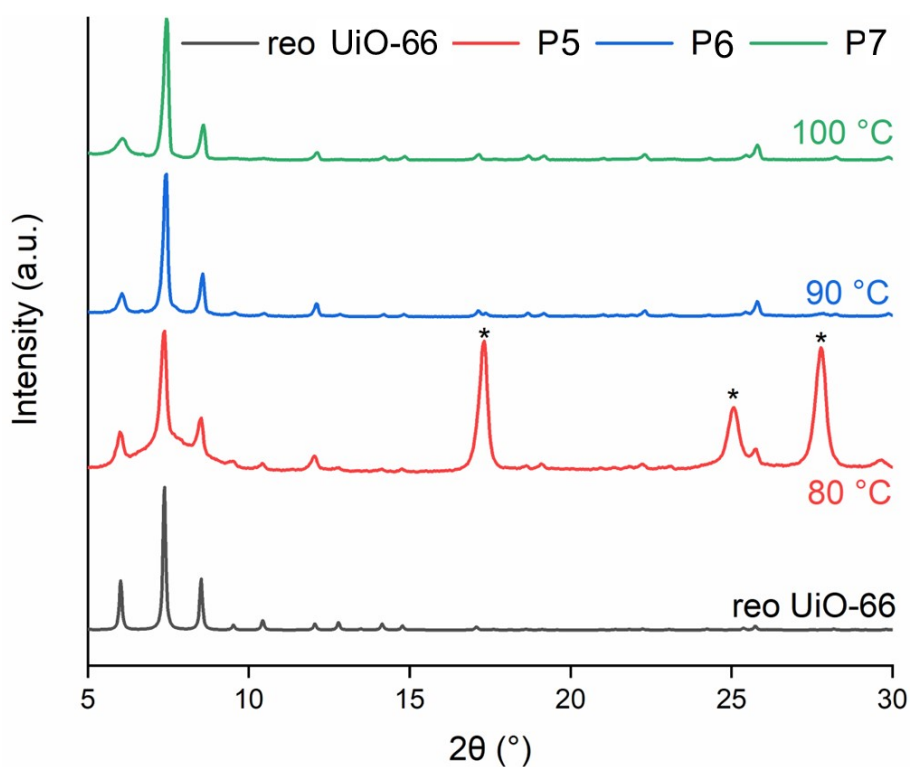

**Figure S3.** PXRD patterns of P5 (red, 80 °C), P6 (blue, 90 °C) and P7 (green, 100 °C). Reaction conditions: 20 eq AA, 20 eq HCl. Asterisks (\*) indicate peaks associated with crystallised  $H_2BDC$  in P5.

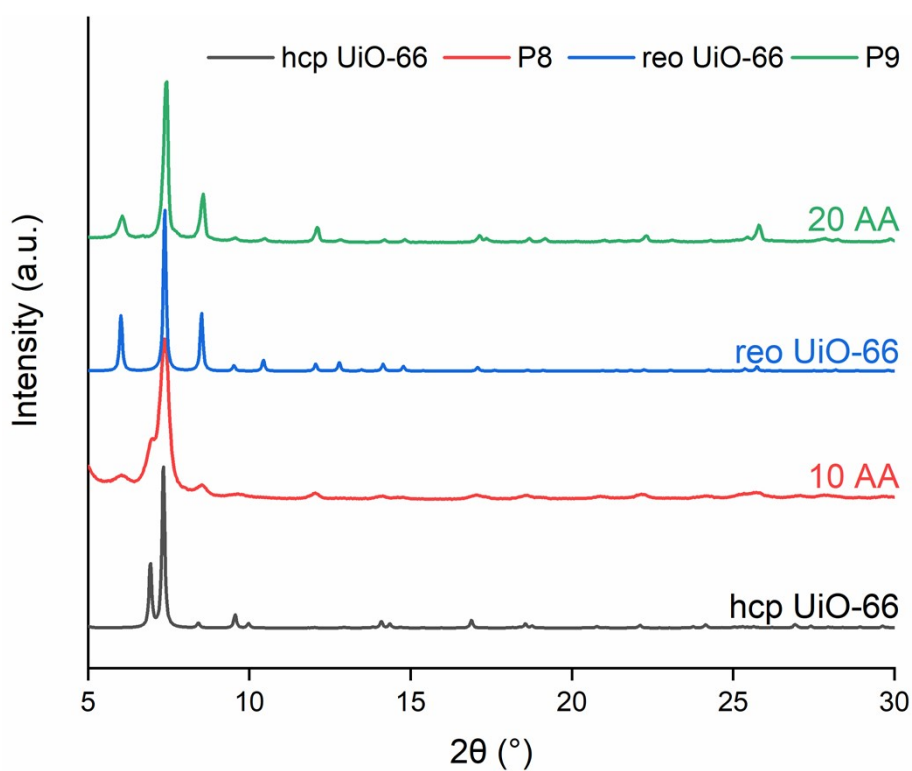

**Figure S4:** PXRD patterns of P8 (red) and P9 (blue). Reaction conditions: 20 eq HCl, 24 h, 90 °C.

## Mechanistic hypothesis

**Table S2:** syntheses performed starting from 1 mmol H<sub>2</sub>BDC and 1 mmol ZrOCl<sub>2</sub>·8H<sub>2</sub>O in aqueous medium (10 mL total volume).

| Sample | Temperature (°C) | HCl (eq) | AA (eq) | Time (h) | RME (%)    |
|--------|------------------|----------|---------|----------|------------|
| P10    | 100              | 20       | 20      | 24       | no product |
| P11    | 90               | -        | 10      | 24       | no product |
| P12    | 90               | -        | -       | 5        | no product |

With P10, the objective was to evaluate the formation of solid product working in similar conditions to those of the previously described experiments, simply using H<sub>2</sub>BDC instead of DMT. After washing the product with DMF, it was noted that it completely dissolved, suggesting that the obtained white solid was unreacted H<sub>2</sub>BDC. It was hypothesized that, because of the presence of HCl, H<sub>2</sub>BDC remains protonated and cannot coordinate to zirconium. Based on this hypothesis, P11 was conducted in the absence of HCl and with a lower content of AA (10 eq). Despite these precautions, also in this case no formation of the MOF was observed. To verify if the presence of AA was responsible for no MOF formation, P12 was conducted in the absence of either acid. Also in this test, the result was the same, with H<sub>2</sub>BDC as the only end solid product.

**Table S3:** syntheses performed starting from 1 mmol H<sub>2</sub>BDC and 1 mmol ZrOCl<sub>2</sub>·8H<sub>2</sub>O in methanolic medium (10 mL total volume).

| Sample | Temperature (°C) | HCl (eq) | H <sub>2</sub> O <sup>a</sup> (eq) | Time (h) | RME (%) | Phase          | FWHM <sup>c</sup> (°) |
|--------|------------------|----------|------------------------------------|----------|---------|----------------|-----------------------|
| P13    | RT               | 20       | 80                                 | 168      | 7       | - <sup>d</sup> | - <sup>d</sup>        |
| P14    | 60               | 20       | 80                                 | 24       | 60      | <b>fcu</b>     | 0.40                  |
| P15    | 60               | 30       | 114                                | 96       | 54      | <b>fcu</b>     | 0.41                  |
| P16    | 90               | 20       | 80                                 | 24       | 51      | <b>fcu</b>     | 0.47                  |

<sup>a</sup> Water originating from the HCl solution (37 wt% in water, 12 M); <sup>b</sup> Maximum RME obtainable starting from H<sub>2</sub>BDC and assuming an ideal defect free product with **fcu** topology of formula Zr<sub>6</sub>O<sub>4</sub>(OH)<sub>4</sub>(BDC)<sub>6</sub> = 57%; <sup>c</sup> FWHM of reflection 111 (located at 7.3°); <sup>d</sup> nearly amorphous product

All reactions in Table S3, except for P13, show high RME. This difference can be attributed to the lower temperature of P13, that may have kinetically hampered the reaction. From the comparison of P14, P15 and P16, it seems that higher temperatures or higher concentration of HCl lead to a slight decrease in RME. **Figure S5** shows that all the three samples are **fcu** UiO-66. It seems that this type of synthesis is very robust since there are no significant differences in diffraction patterns with changes in temperature, HCl and water content.

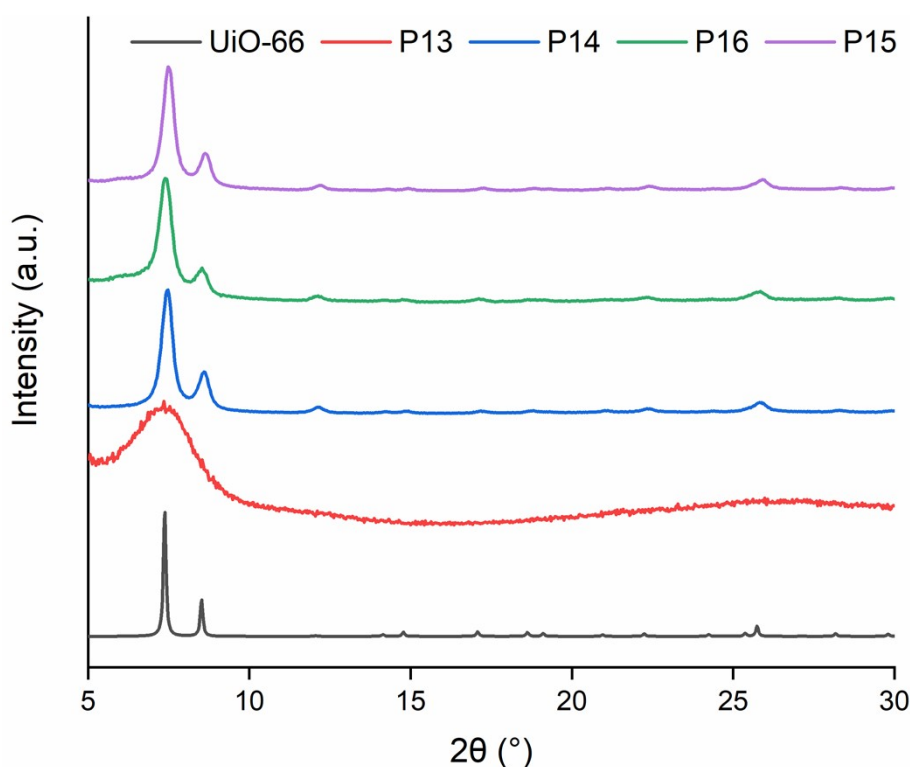

**Figure S5:** PXRD pattern of samples synthesised starting from H<sub>2</sub>BDC in MeOH in the conditions reported in Table S3.

**Table S4:** syntheses from 1 mmol MMT/DMT, 1 mmol ZrOCl<sub>2</sub>·8H<sub>2</sub>O in water (10 mL total volume) at 90 °C. Workup protocol: 10 mL 0.1 M TEA in MeOH, 60 min x 2; 10 mL MeOH, 60 min x 2; 10 mL acetone, 60 min x 1.

| Sample | Organic precursor | HCl (eq) | H <sub>2</sub> O (eq) | Time (h) | Yield (mg) | Phase          |
|--------|-------------------|----------|-----------------------|----------|------------|----------------|
| P17    | MMT               | 15       | 15                    | 5        | 208        | <b>fcu</b>     |
| P18    | DMT               | 15       | 15                    | 26       | 192        | <b>fcu/reo</b> |

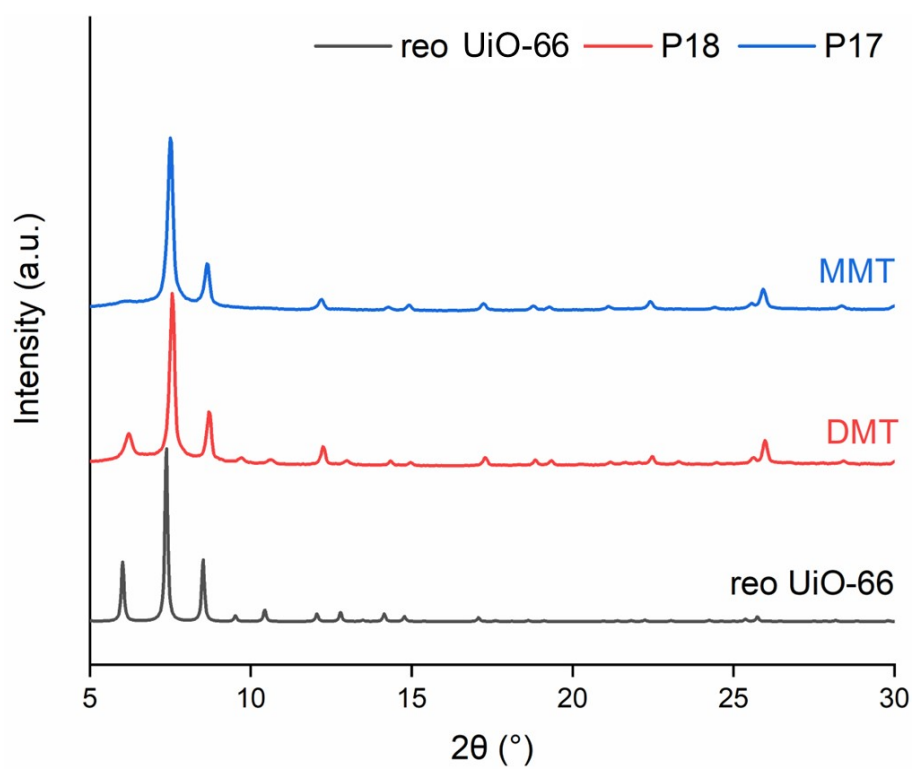

**Figure S6:** PXRD patterns of P17 (blue) and P18 (red). Reaction conditions: 15 eq AA, 15 eq HCl, 5 h.

## Design of experiments

The preliminary screening experiments using DMT were performed starting directly from the commercially available DMT pills, which tend to react slowly due to their morphology. To increase the surface/volume ratio, it was tried to grind DMT, but this approach was not successful because of the sticky nature of the solid, that makes it very difficult to accurately weigh and transfer the DMT powder. It was also tried to solubilise DMT in AA and then add it to the water-based reaction mixture, causing the reprecipitation of diesters in the form of flakes, with a much higher exposed surface than commercially available pills. This strategy was not successful either, because, despite the stirring, these flakes tend to stick to the internal walls of the glass vial, without being able to react completely.

**Table S5:** syntheses from 1 mmol DMT/BHET, 1 mmol  $\text{ZrOCl}_2 \cdot 8\text{H}_2\text{O}$  in water (10 mL total volume) at 90 °C. Workup protocol: 10 mL 0.1 M TEA in MeOH, 60 min x 2; 10 mL MeOH, 60 min x 2; 10 mL acetone, 60 min x 1.

| Sample | Diester | AA (eq) | HCl (eq) | Time (h) | Yield (mg) | Phase          | FWHM <sup>a</sup> (°) |
|--------|---------|---------|----------|----------|------------|----------------|-----------------------|
| P2     | DMT     | 10      | 10       | 5        | 87         | <b>hcp</b>     | 0.25                  |
| P2_b   | BHET    | 10      | 10       | 5        | 116        | <b>hcp</b>     | – <sup>b</sup>        |
| P6     | DMT     | 20      | 20       | 5        | 100        | <b>fcu/reo</b> | 0.16                  |
| P6_b   | BHET    | 20      | 20       | 2        | 72         | <b>fcu</b>     | 0.17                  |

<sup>a</sup> FWHM of reflection 111 for **fcu** phase and reflection 101 for **hcp** phase (both reflections are located at 7.3°);

<sup>b</sup> the 101 reflection is superimposed with the 100 reflection.

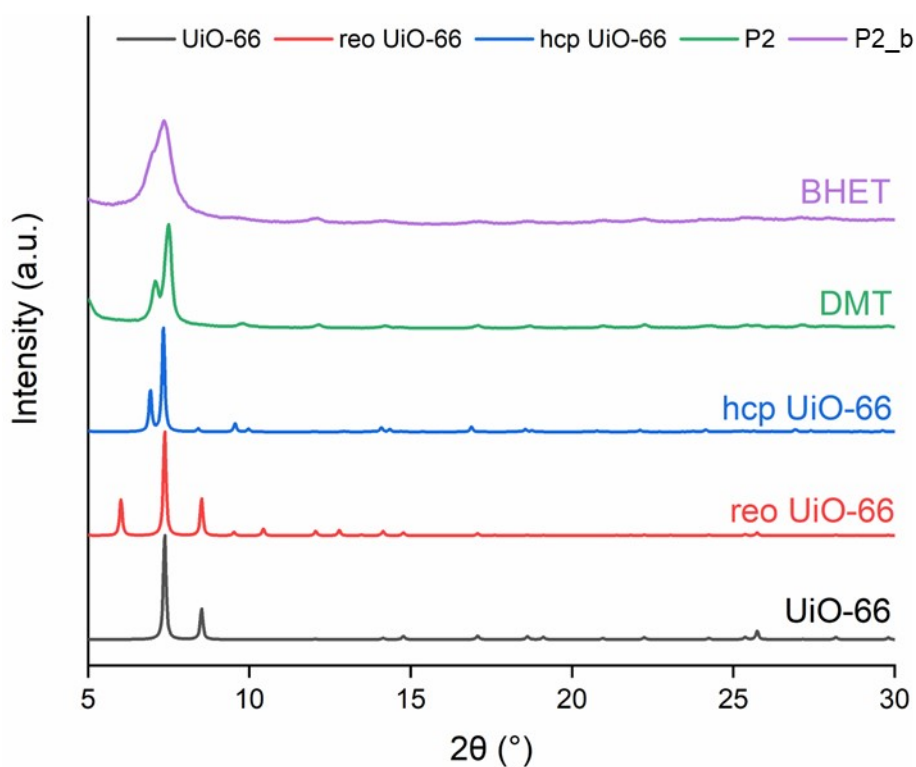

**Figure S7:** PXRD pattern of P2 (green) and P45 (purple). Reaction conditions: 10 eq AA, 10 eq HCl, 24 h.

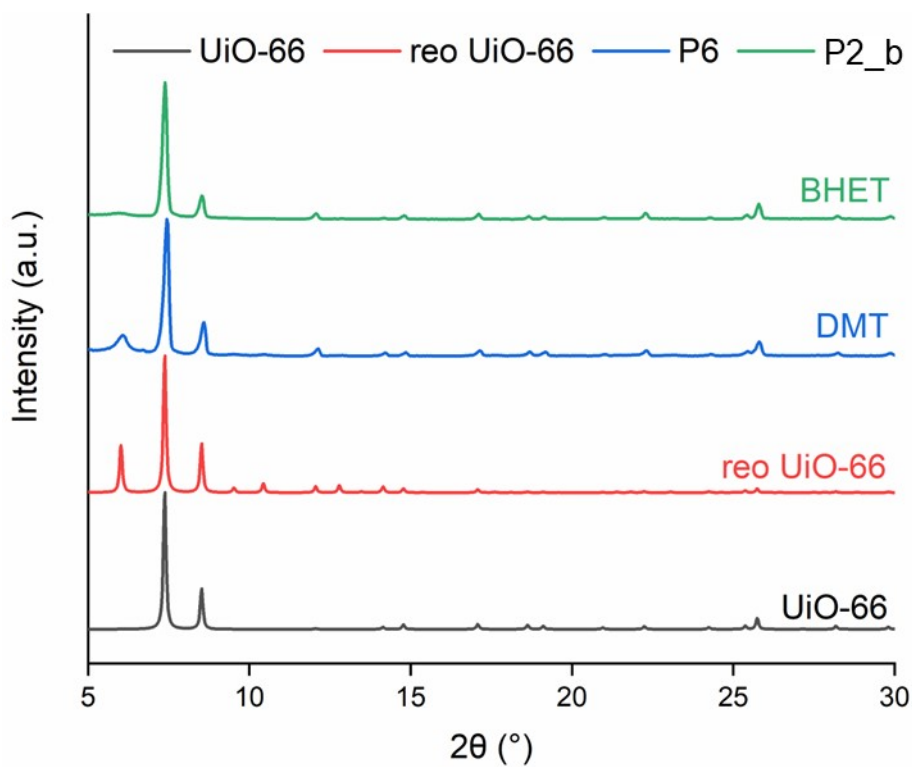

**Figure S8:** PXRD pattern of P6 (blue) and P46 (green). Reaction conditions: 20 eq AA, 20 eq HCl, 24 h.

CCD allows to estimate a quadratic model with linear, quadratic and interaction terms. In this way is possible to estimate the maximum and minimum of the calculated function, like the yield in a synthesis process. Mathematically, this type of model can be written as reported in **Equation S1**.

$$Y = b_0 + \sum_{i=1}^k b_i x_i + \sum_{i=1}^k b_{ii} x_i^2 + \sum_{i < j} \sum b_{ij} x_i x_j$$

**Equation S1**

Where:

- **Y** (dependent variable) is the response
- **$b_0$**  is the intercept, and it is a constant. It sets average value of the function
- **$b_j$**  is correlated to the effect of the variable  **$i$**
- **$b_{ii}$**  is correlated to the combined effect of variable  **$i$**  with itself, and it is used to determine the curvature of the function
- **$b_{ij}$**  is correlated to the combined effect of variables  **$i$**  and  **$j$** , and it expresses the synergic effect of these variables
- **$x_i$**  and  **$x_j$**  are the variables considered

**Table S6:** regression coefficients of experimental design and their statistical significance

|              |         |
|--------------|---------|
| $\beta_0$    | 41      |
| $\beta_1$    | -8.5**  |
| $\beta_2$    | -2.6*   |
| $\beta_3$    | -1.0    |
| $\beta_{12}$ | -1.0    |
| $\beta_{13}$ | 2.5*    |
| $\beta_{23}$ | -0.75   |
| $\beta_{11}$ | -9.28** |
| $\beta_{22}$ | -8.78** |
| $\beta_{33}$ | 2.22    |
| $R^2$        | 0.972   |

□□ □□□ ≤ □□□□□□□□□□□ □ □□□□ □ □□□ ≤ □□□□□□□□□□□ □ □□□

The analysis of regression coefficients in Table S6 shows that RME has a significant dependence on the linear term associated with AA ( $\beta_1$ ), which negatively influences the

response, and the quadratic terms associated with AA ( $\beta_{11}$ ) and HCl ( $\beta_{22}$ ), both of whom have a negative effect on the response. Instead, the regression coefficient associated with reaction time ( $\beta_3$ ) seems not to be very significant, indicating that time is not a very influential parameter on RME within the investigated range. Furthermore, synergic effects seem to be very limited, except for the coefficient associated to the synergic effect of AA and time ( $\beta_{13}$ ).

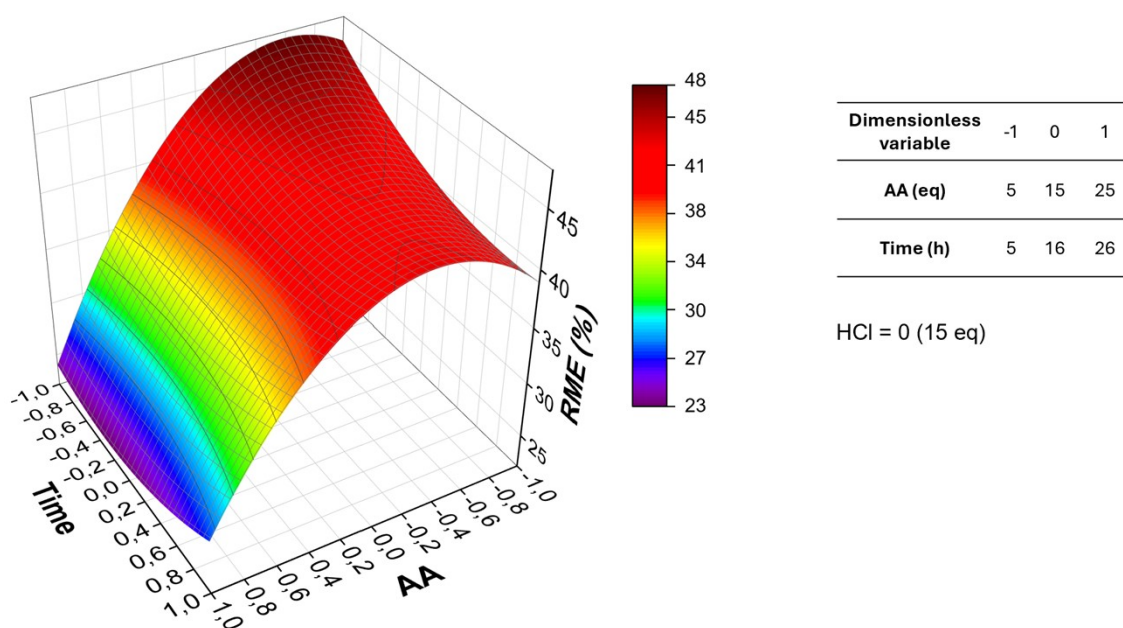

**Figure S9.** Response surface for RME (%) as a function of AA and time at fixed HCl amount of 15 eq.

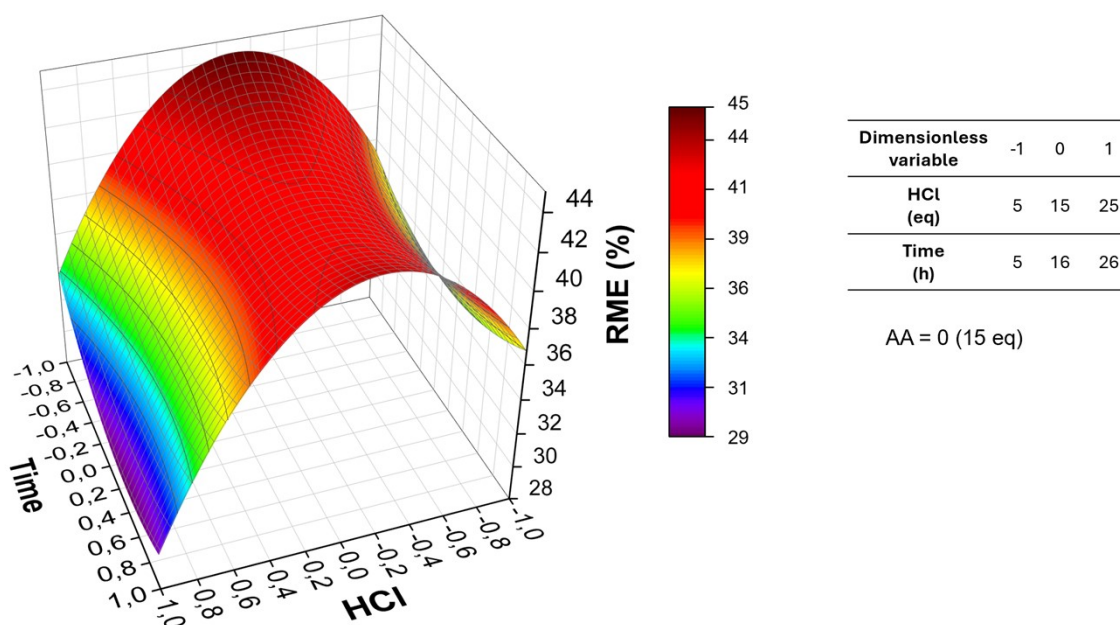

**Figure S10.** Response surface for RME (%) as a function of HCl and time at fixed AA amount of 15 eq.

**Table S7:** univariate analysis of the effect of the amount of AA on RME and phase selection.

| Sample | AA (eq) | HCl (eq) | Time (h) | RME (%) | Phase                               | FWHM <sup>a</sup> (°) |
|--------|---------|----------|----------|---------|-------------------------------------|-----------------------|
| P26    | 5       | 5        | 26       | 34      | <b>hcp</b>                          | - <sup>b</sup>        |
| P20    | 25      | 5        | 26       | 21      | <b>hcp + fcu + H<sub>2</sub>BDC</b> | - <sup>c</sup>        |
| P25    | 5       | 25       | 26       | 25      | <b>fcu + H<sub>2</sub>BDC</b>       | - <sup>c</sup>        |
| P22    | 25      | 25       | 26       | 16      | <b>H<sub>2</sub>BDC + fcu</b>       | - <sup>c</sup>        |
| P27    | 5       | 15       | 16       | 42      | <b>hcp</b>                          | - <sup>b</sup>        |
| P33    | 15      | 15       | 16       | 42      | <b>fcu</b>                          | 0.19                  |
| P32    | 25      | 15       | 16       | 21      | <b>fcu + H<sub>2</sub>BDC</b>       | - <sup>c</sup>        |
| P24    | 5       | 5        | 5        | 36      | <b>hcp</b>                          | - <sup>b</sup>        |
| P21    | 25      | 5        | 5        | 21      | <b>fcu</b>                          | 0.43                  |
| P19    | 5       | 25       | 5        | 38      | <b>fcu</b>                          | 0.49                  |
| P23    | 25      | 25       | 5        | 11      | <b>H<sub>2</sub>BDC</b>             | - <sup>c</sup>        |

<sup>a</sup> FWHM of reflection 111 for **fcu** phase and reflection 101 for **hcp** phase (both reflections are located at 7.3°); <sup>b</sup> the 101 reflection is superimposed with the 100 reflection; <sup>c</sup> FWHM not reported for mixed phase systems and when H<sub>2</sub>BDC is the only crystalline phase.

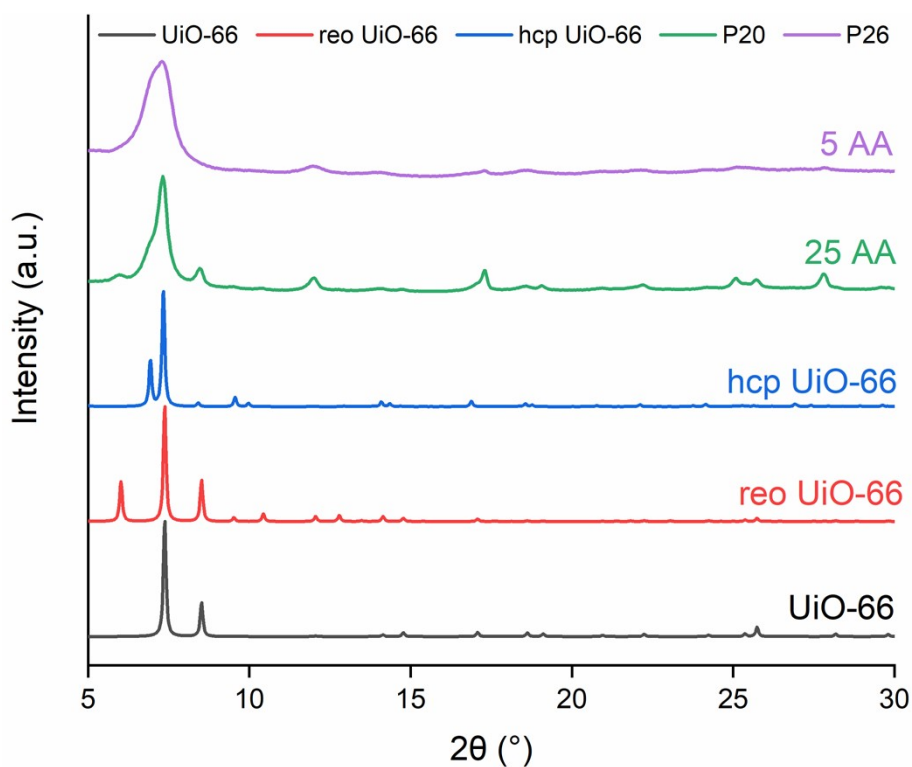

**Figure S11:** PXRD patterns of P20 (blue) and P26 (purple). Reaction conditions: 5 eq HCl, 26 h.

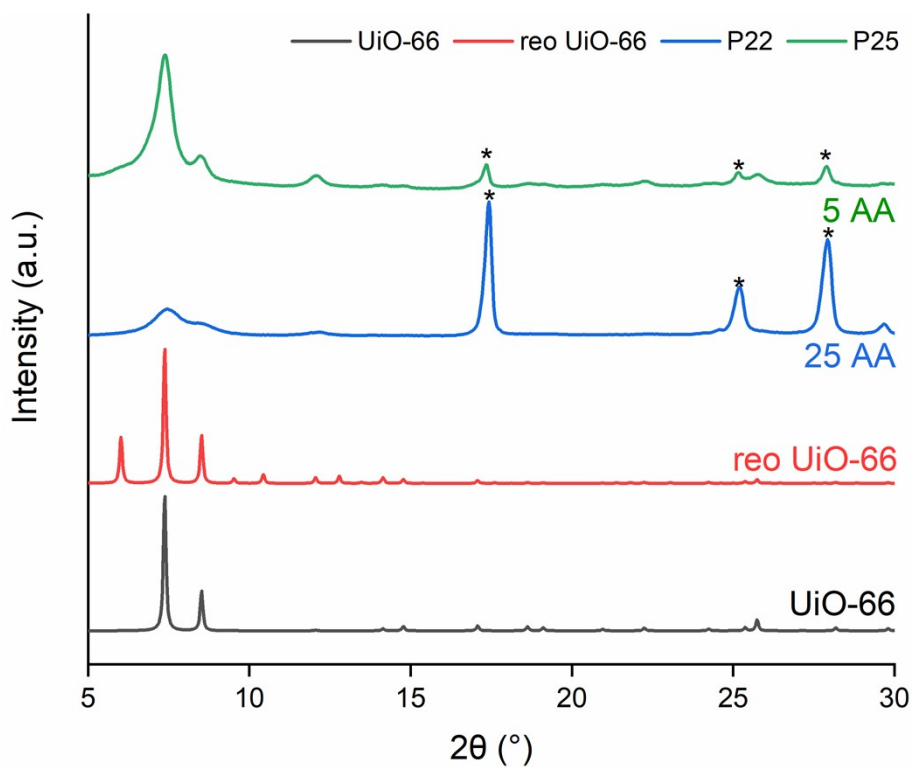

**Figure S12:** PXRD patterns of P22 (blue) and P25 (green). Reaction conditions: 25 eq HCl, 26 h. \* indicates peaks associated with crystallised  $H_2BDC$ .

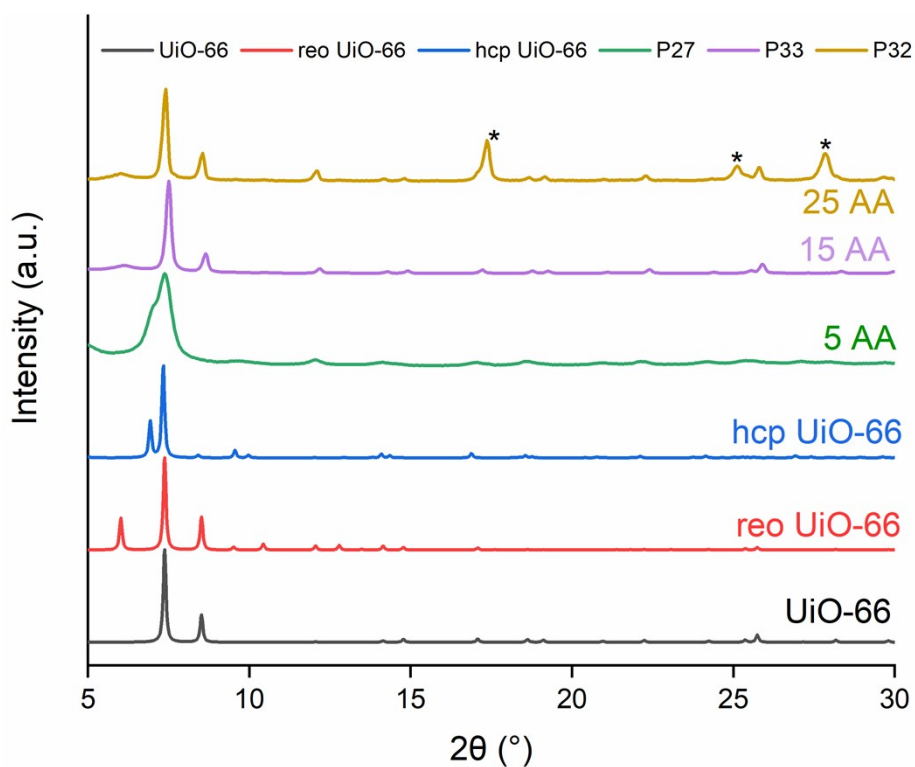

**Figure S13:** PXRD pattern of P27 (green), P33 (purple) and P32 (yellow). Reaction conditions: 15 eq HCl, 16 h. \* indicates peaks associated with crystallized H<sub>2</sub>BDC

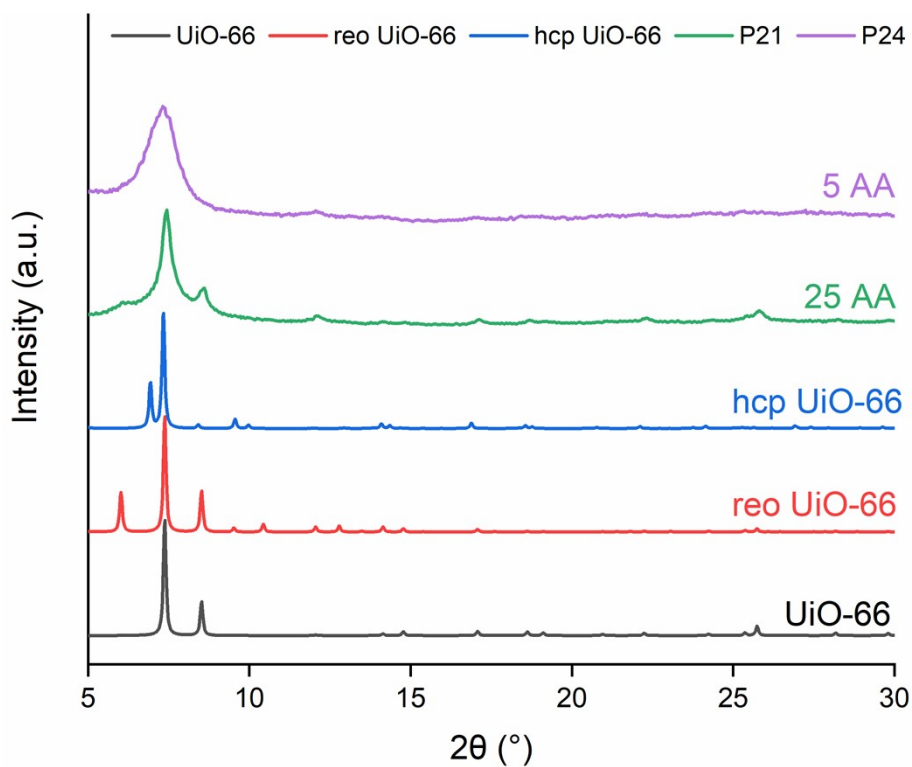

**Figure S14:** PXRD pattern of P21 (green), P24 (purple). Reaction conditions: 5 eq HCl, 5 h.

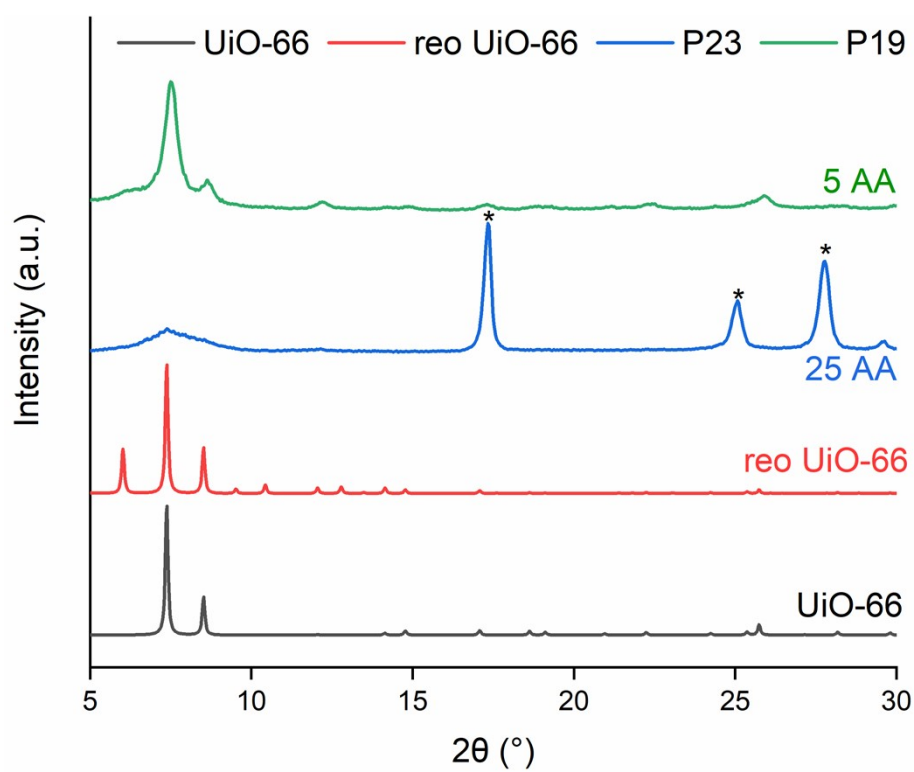

**Figure S15:** PXRD pattern of P23 (blue), P19 (green). Reaction conditions: 25 HCl, 5 h, \* indicates peaks associated with crystallised H<sub>2</sub>BDC.

**Table S8:** univariate analysis of the effect of the amount of HCl on RME and phase selection.

| Sample | AA (eq) | HCl (eq) | Time (h) | RME (%) | Phase                               | FWHM <sup>a</sup> (°) |
|--------|---------|----------|----------|---------|-------------------------------------|-----------------------|
| P21    | 25      | 5        | 5        | 21      | <b>fcu</b>                          | 0.43                  |
| P23    | 25      | 25       | 5        | 11      | H <sub>2</sub> BDC                  | - <sup>c</sup>        |
| P24    | 5       | 5        | 5        | 36      | <b>hcp</b>                          | - <sup>b</sup>        |
| P19    | 5       | 25       | 5        | 38      | <b>fcu</b>                          | 0.49                  |
| P28    | 15      | 5        | 16       | 34      | <b>fcu</b>                          | 0.46                  |
| P33    | 15      | 15       | 16       | 42      | <b>fcu</b>                          | 0.19                  |
| P30    | 15      | 25       | 16       | 30      | <b>fcu</b>                          | 0.17                  |
| P20    | 25      | 5        | 26       | 21      | <b>hcp + fcu + H<sub>2</sub>BDC</b> | - <sup>c</sup>        |
| P22    | 25      | 25       | 26       | 16      | H <sub>2</sub> BDC                  | - <sup>c</sup>        |
| P26    | 5       | 5        | 26       | 34      | <b>hcp</b>                          | - <sup>b</sup>        |
| P25    | 5       | 25       | 26       | 25      | <b>fcu</b>                          | 0.59                  |

<sup>a</sup> FWHM of reflection 111 for **fcu** phase and reflection 101 for **hcp** phase (both reflections are located at 7.3°); <sup>b</sup> the 101 reflection is superimposed with the 100 reflection; <sup>c</sup> FWHM not reported for mixed phase systems and when H<sub>2</sub>BDC is the only crystalline phase.

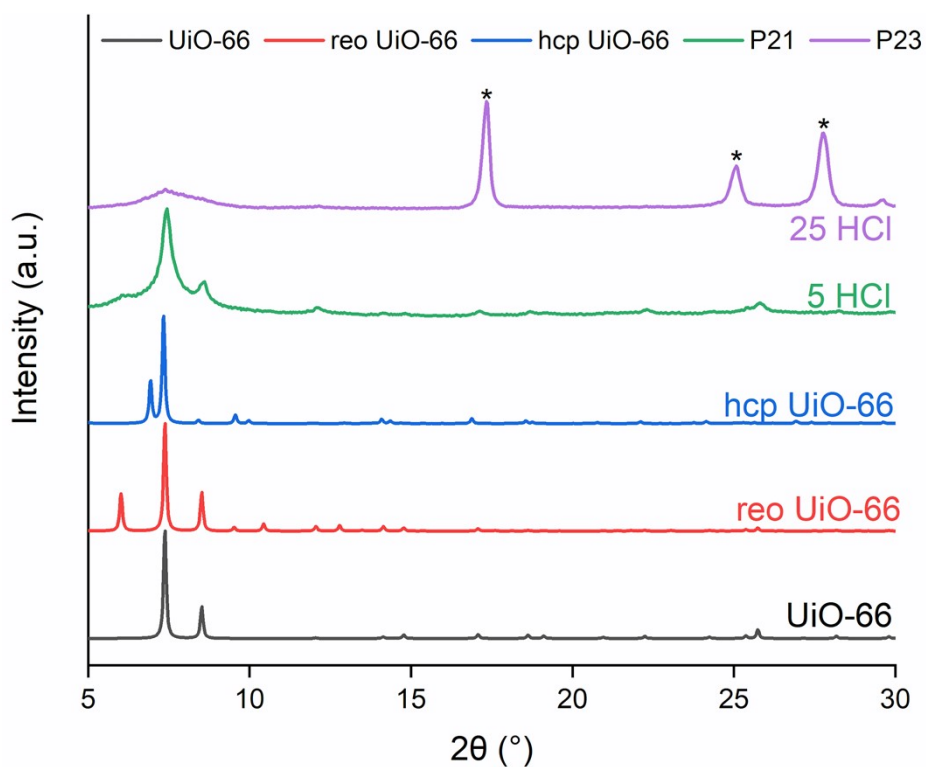

**Figure S16:** PXRD pattern of P21 (green) and P23 (purple). Reaction conditions: 25 AA, 5 h. \* indicates peaks associated with crystallised  $H_2BDC$

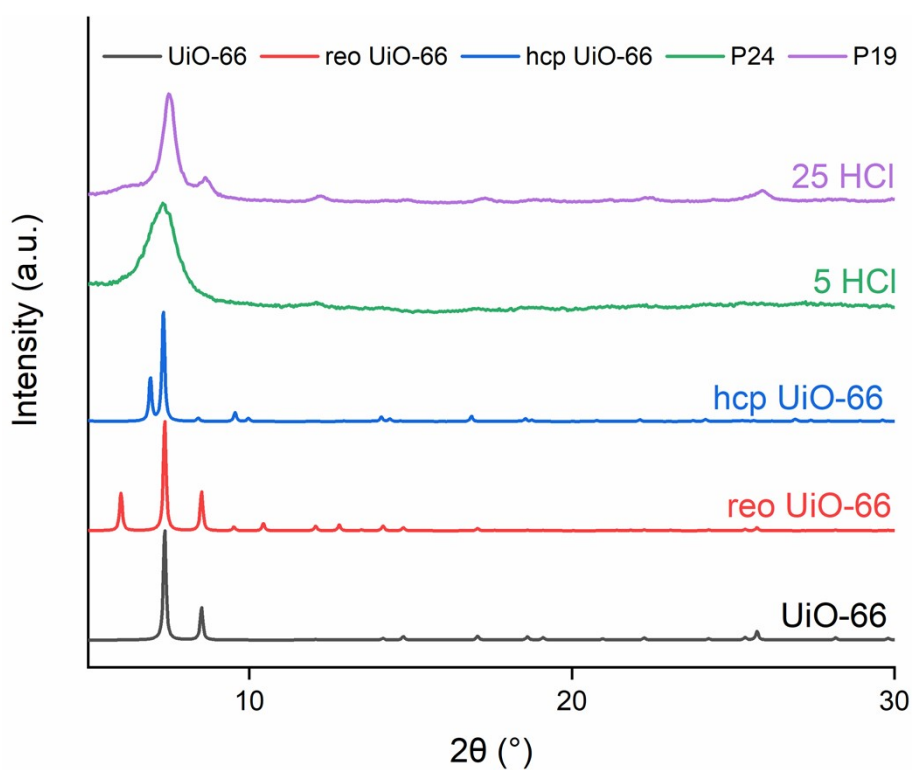

**Figure S17:** PXRD patterns of P24 (green) and P19 (purple). Reaction conditions: 5 AA, 5 h.

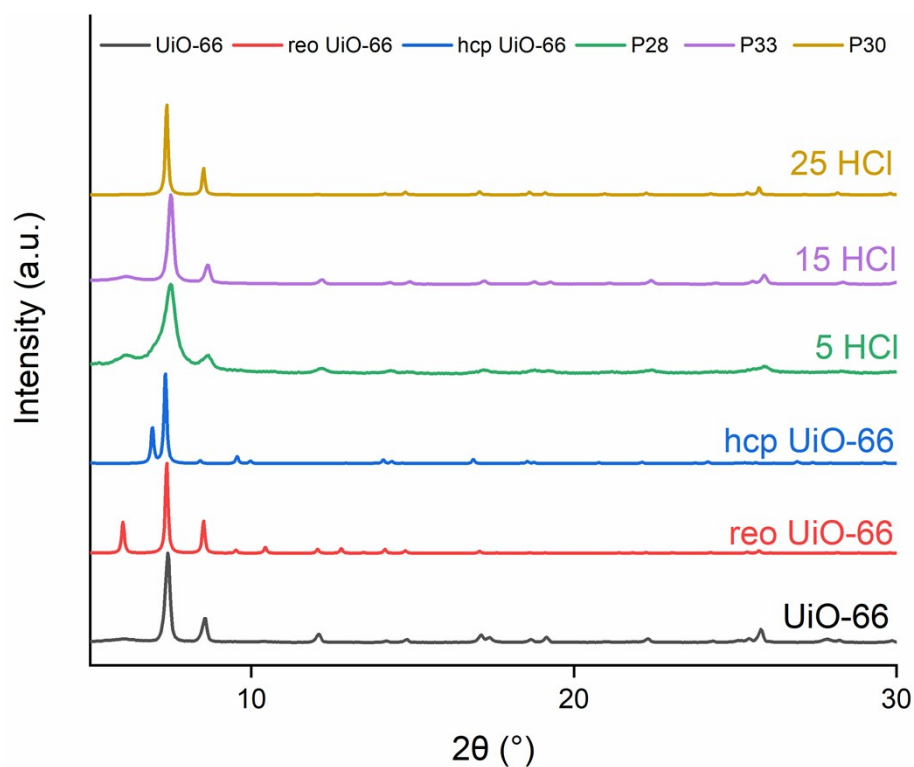

**Figure S18:** PXRD pattern of P28 (green) and P33 (purple) and P30 (yellow). Reaction conditions: 15 AA, 16 h.

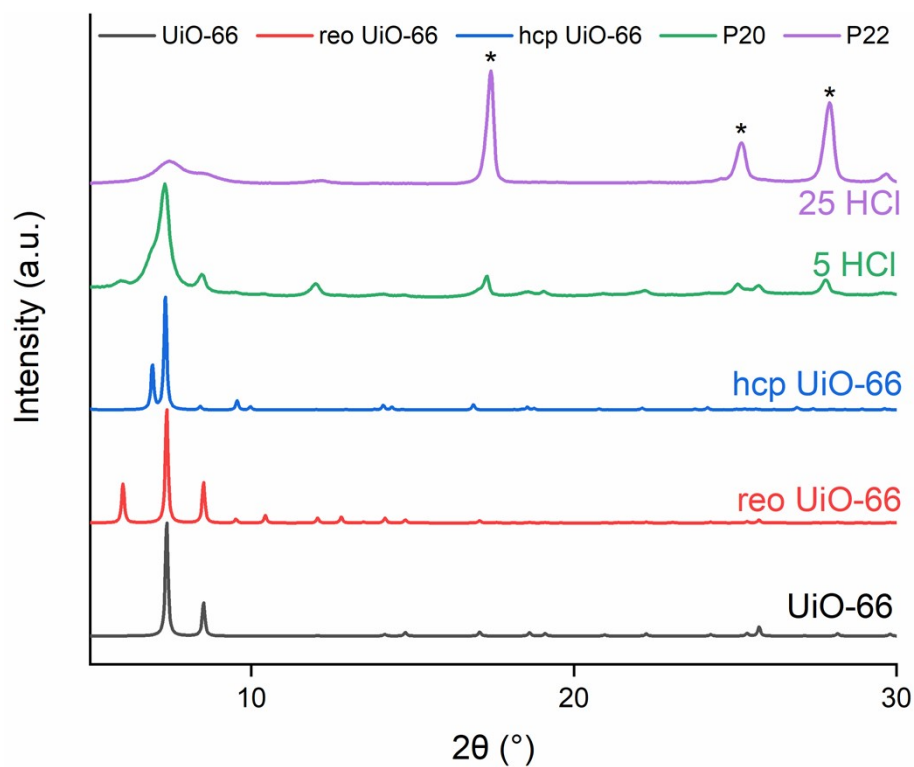

**Figure S19:** PXRD pattern of P20 (green) and P22 (purple). Reaction conditions: 25 AA, 26 h. \* indicates peaks associated with crystallised H<sub>2</sub>BDC.

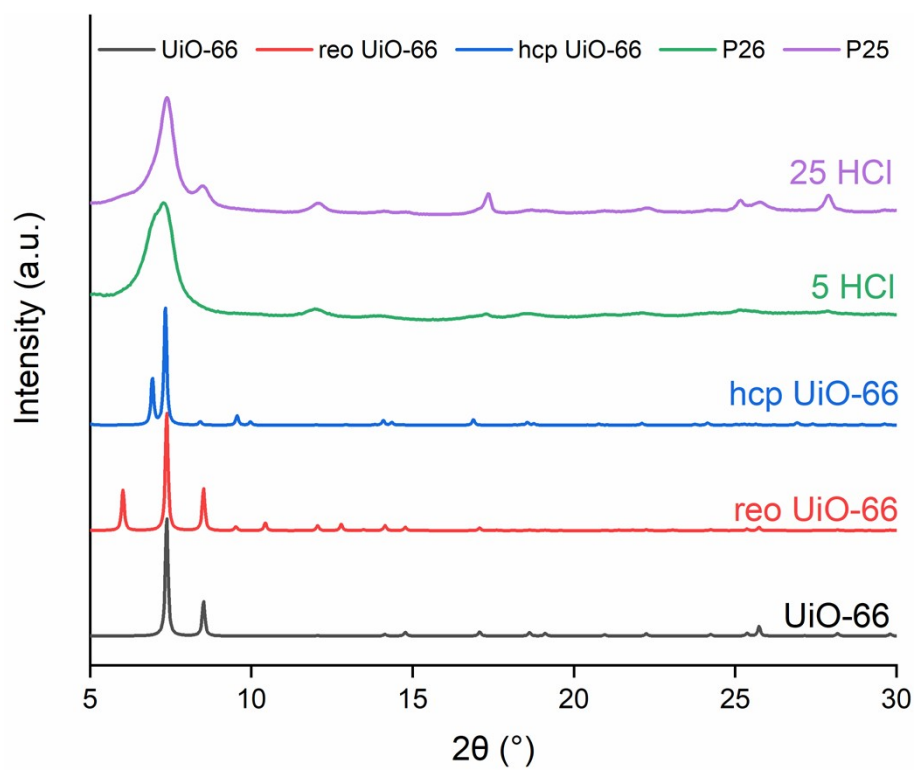

**Figure S20:** PXRD pattern of P26 (green) and P25 (purple). Reaction conditions: 5 AA, 26 h.

**Table S9:** univariate analysis of the effect of reaction time on RME and phase selection.

| Sample | AA (eq) | HCl (eq) | Time (h) | RME (%) | Phase                                        | FWHM <sup>a</sup> (°) |
|--------|---------|----------|----------|---------|----------------------------------------------|-----------------------|
| P19    | 5       | 25       | 5        | 38      | <b>fcu</b>                                   | 0.49                  |
| P25    | 5       | 25       | 26       | 25      | <b>fcu</b> + H <sub>2</sub> BDC              | - <sup>c</sup>        |
| P21    | 25      | 5        | 5        | 21      | <b>fcu</b>                                   | 0.43                  |
| P20    | 25      | 5        | 26       | 21      | <b>fcu</b> + <b>hcp</b> + H <sub>2</sub> BDC | - <sup>c</sup>        |
| P29    | 15      | 15       | 5        | 43      | <b>fcu</b>                                   | 0.17                  |
| P33    | 15      | 15       | 16       | 42      | <b>fcu</b>                                   | 0.19                  |
| P31    | 15      | 15       | 26       | 43      | <b>fcu</b>                                   | 0.22                  |
| P23    | 25      | 25       | 5        | 11      | H <sub>2</sub> BDC                           | - <sup>c</sup>        |
| P22    | 25      | 25       | 26       | 16      | H <sub>2</sub> BDC + <b>fcu</b>              | - <sup>c</sup>        |
| P24    | 5       | 5        | 5        | 36      | <b>hcp</b>                                   | - <sup>b</sup>        |
| P26    | 5       | 5        | 26       | 34      | <b>hcp</b>                                   | - <sup>b</sup>        |

<sup>a</sup> FWHM of reflection 111 for **fcu** phase and reflection 101 for **hcp** phase (both reflections are located at 7.3°); <sup>b</sup> the 101 reflection is superimposed with the 100 reflection; <sup>c</sup> FWHM not reported for mixed phase systems and when H<sub>2</sub>BDC is the only crystalline phase.

**Table S10:** tests performed to optimise the reaction time. Workup protocol: 10 mL DMF, 90 min x 2; 10 mL MeOH, 90 min x 2; 10 mL acetone, 90 min x 1.

| Sample | AA (eq) | HCl (eq) | Time (h) | RME (%) |
|--------|---------|----------|----------|---------|
| P34    | 15      | 15       | 1        | 10      |
| P35    | 15      | 15       | 2        | 34      |
| P36    | 15      | 15       | 3        | 34      |
| P37    | 15      | 15       | 4        | 35      |
| P38    | 15      | 15       | 5        | 34      |

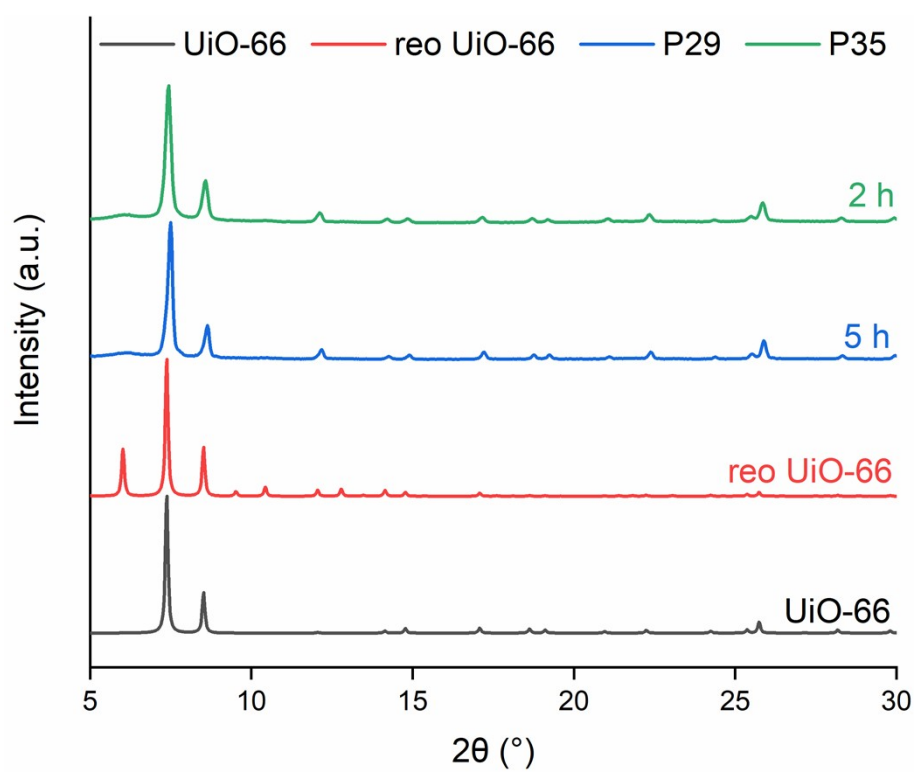

**Figure S21:** PXRD patterns of P29 (blue) and P35 (green). Reaction conditions: 15 AA and 15 HCl.

## Optimisation of the workup protocol

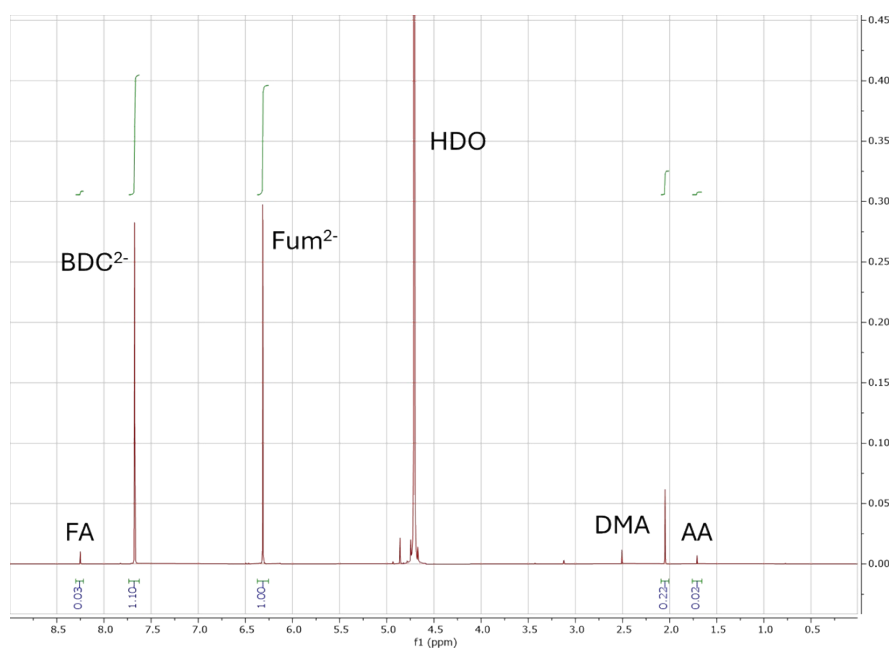

**Figure S22:** Quantitative <sup>1</sup>H-NMR spectrum of P38 (18.0 mg) digested in 1.0 mL of 1.0 M NaOH in D<sub>2</sub>O with 0.10 M fumaric acid as internal standard. The signal of BDC<sup>2-</sup> at 7.6 ppm accounts for four aromatic protons, therefore its integral must be divided by four to obtain the values comparable with that of fumarate (Fum<sup>2-</sup>, 1.00) at 6.3 ppm, which accounts for only two protons. The signals of dimethylamine (DMA) at 2.1 ppm (six protons) and formic acid (FA) at 8.3 ppm (one proton), derived from hydrolysis of residual DMF in the pores, are not significant. The signal of AA (three protons) at 1.7 ppm is also not significant, indicating that AA is not retained as a defect-compensating species in the MOF. Given the concentration of Fum<sup>2-</sup> is 0.10 M, the concentration of BDC<sup>2-</sup> is found to be 0.055 M, corresponding to 9.0 mg (50 wt%). The chemical formula of P38 can be derived by assuming the general formula Zr<sub>6</sub>O<sub>4</sub>(OH)<sub>4</sub>(BDC)<sub>6-x</sub>(OH/H<sub>2</sub>O)<sub>2x</sub>, where the value of x can be derived by imposing that the wt% of BDC<sup>2-</sup> be 50%, leading to Zr<sub>6</sub>O<sub>4</sub>(OH)<sub>4</sub>(BDC)<sub>4.68</sub>(OH/H<sub>2</sub>O)<sub>2.64</sub>.

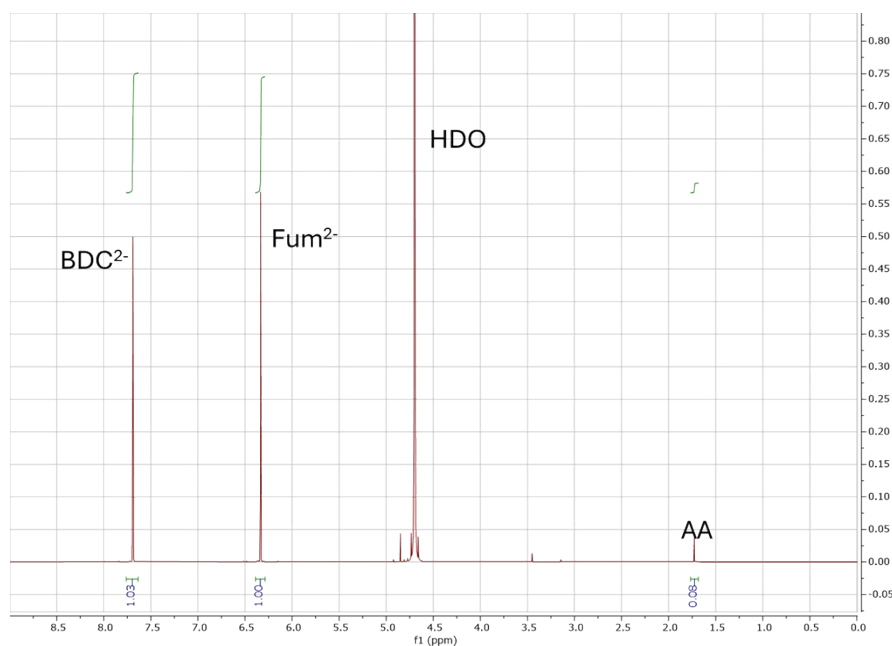

**Figure S23:** Quantitative  $^1\text{H}$ -NMR spectrum of P29 (14.2 mg) digested in 1.0 mL of 1.0 M NaOH in  $\text{D}_2\text{O}$  with 0.10 M fumaric acid as internal standard. The signals of  $\text{BDC}^{2-}$  at 7.6 ppm account for four aromatic protons, therefore its integral must be divided by four to obtain the values comparable with that of fumarate ( $\text{Fum}^{2-}$ ) at 6.3 ppm, which accounts for only two protons. The signal of AA (three protons) at 1.7 ppm is not significant, indicating that AA is not retained as a defect-compensating species in the MOF. Given the concentration of  $\text{Fum}^{2-}$  is 0.10 M, the concentration of  $\text{BDC}^{2-}$  is found to be 0.052 M, corresponding to 8.5 mg (60 wt%). The higher wt% of  $\text{BDC}^{2-}$  than what found for P38 suggests that excess of linker is present in the pores of P29, as the two samples only differ for the workup procedure. The chemical formula of P29 can be derived by assuming the same formula of P38 and accounting for the presence of excess  $\text{H}_2\text{BDC}$  as follows:  $\text{Zr}_6\text{O}_4(\text{OH})_4(\text{BDC})_{4.68}(\text{OH}/\text{H}_2\text{O})_{2.64} \cdot y(\text{H}_2\text{BDC})$ . The value of  $y$  is found to be 2.36.

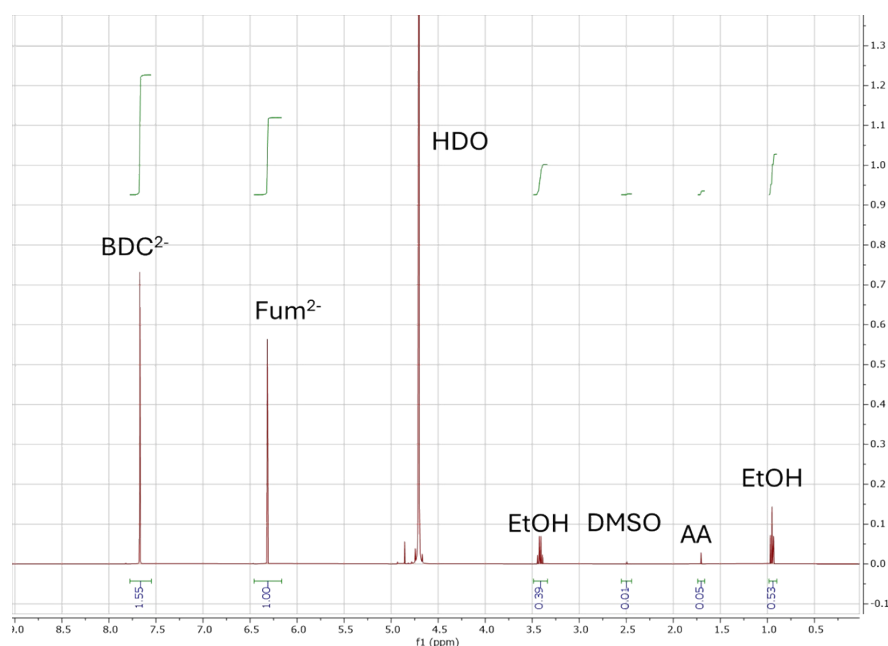

**Figure S24:** Quantitative  $^1\text{H}$ -NMR spectrum of P39 (27.6 mg) digested in 1 mL of 1 M NaOH in  $\text{D}_2\text{O}$  with 0.10 M fumaric acid as internal standard. The signals of  $\text{BDC}^{2-}$  at 7.6 ppm account for four aromatic protons, therefore its integral must be divided by four to obtain the values comparable with that of fumarate ( $\text{Fum}^{2-}$ , 1.00) at 6.3 ppm, which accounts for only two protons. The signal of DMSO (six protons) at 2.5 ppm is not significant, proving that the washing procedure with water is effective at removing DMSO from the pores. The signal of AA (three protons) at 1.7 ppm is also not significant, indicating that AA is not retained as a defect-compensating species in the MOF. The signals of EtOH at 1.0 ppm (three protons) and 3.4 ppm (two protons) indicate that some of the solvent used for the last step of the workup is still present in the pores. Given the concentration of  $\text{Fum}^{2-}$  is 0.10 M, the concentration of  $\text{BDC}^{2-}$  is found to be 0.078 M, corresponding to 12.8 mg (46 wt%), whereas the concentration of EtOH is 0.035 M, corresponding to 1.6 mg (6 wt%). The lower wt% of  $\text{BDC}^{2-}$  than what found for P38 is likely due to the presence of residual solvent in the pores of P39. The chemical formula of P39 can be derived by assuming that all EtOH is physisorbed in the pores and that accounting for a EtOH/ $\text{BDC}^{2-}$  integral ratio of 0.45, leading to the general formula  $\text{Zr}_6\text{O}_4(\text{OH})_4(\text{BDC})_{6-x}(\text{OH}/\text{H}_2\text{O})_{2x} \cdot 0.45(6-x)\text{EtOH}$ . The value of  $x$  can be derived by imposing that the wt% of  $\text{BDC}^{2-}$  be 50%, leading to  $\text{Zr}_6\text{O}_4(\text{OH})_4(\text{BDC})_{4.55}(\text{OH}/\text{H}_2\text{O})_{2.90} \cdot 2.1\text{EtOH}$  is derived, which suggests a slightly higher amount of defects than P38.

## Characterisation

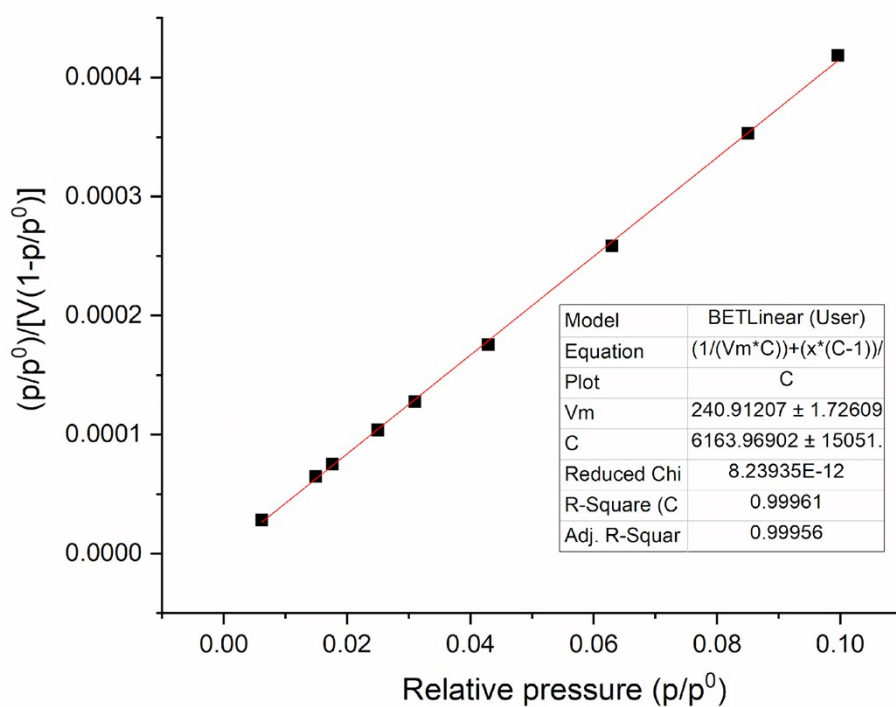

**Figure S25:** Linear fitting of the BET equation in the relative pressure range 0.008-0.10 for No Defective\_UiO-66.

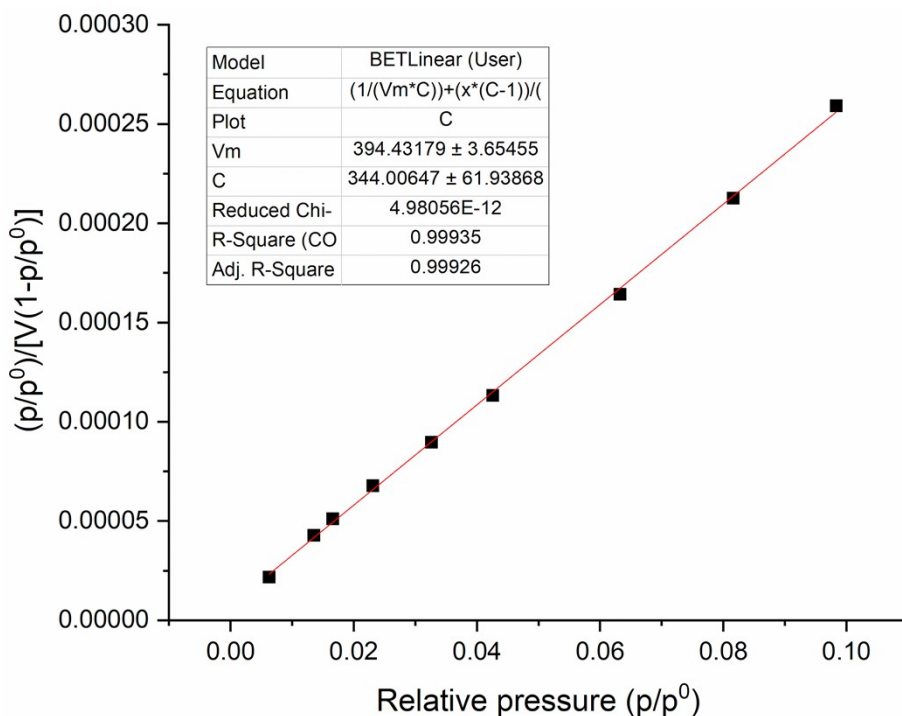

**Figure S26:** Linear fitting of the BET equation in the relative pressure range 0.008-0.10 for Defective\_UiO-66.

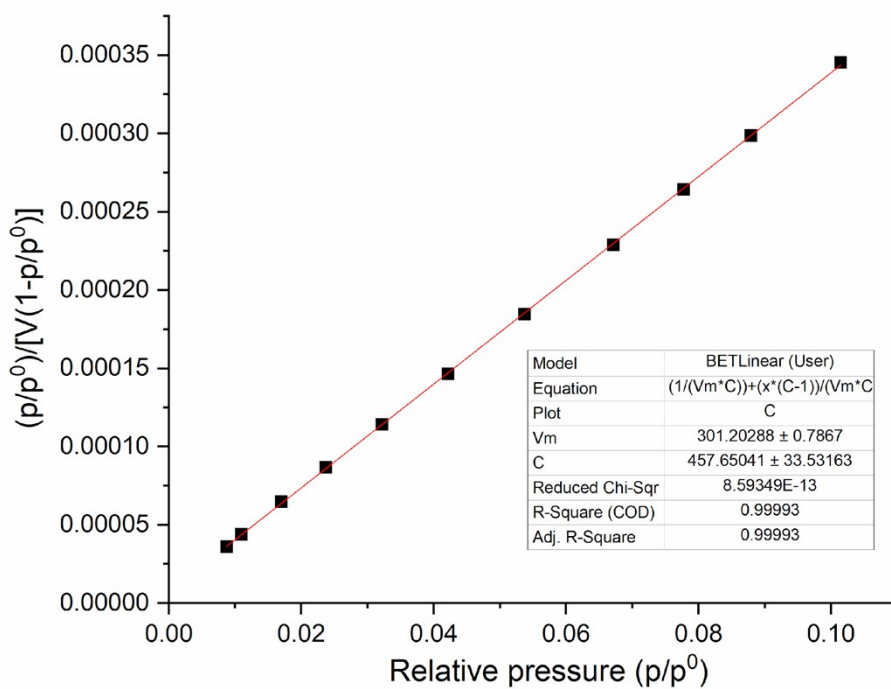

**Figure S27:** Linear fitting of the BET equation in the relative pressure range 0.008-0.10 for P38.

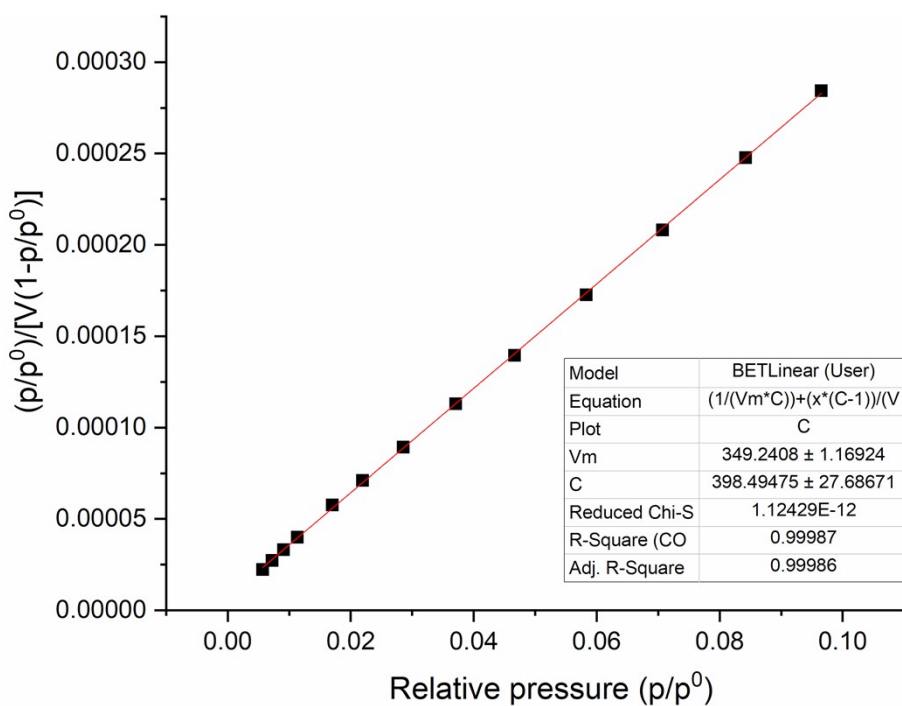

**Figure S28:** Linear fitting of the BET equation in the relative pressure range 0.008-0.10 for P39.

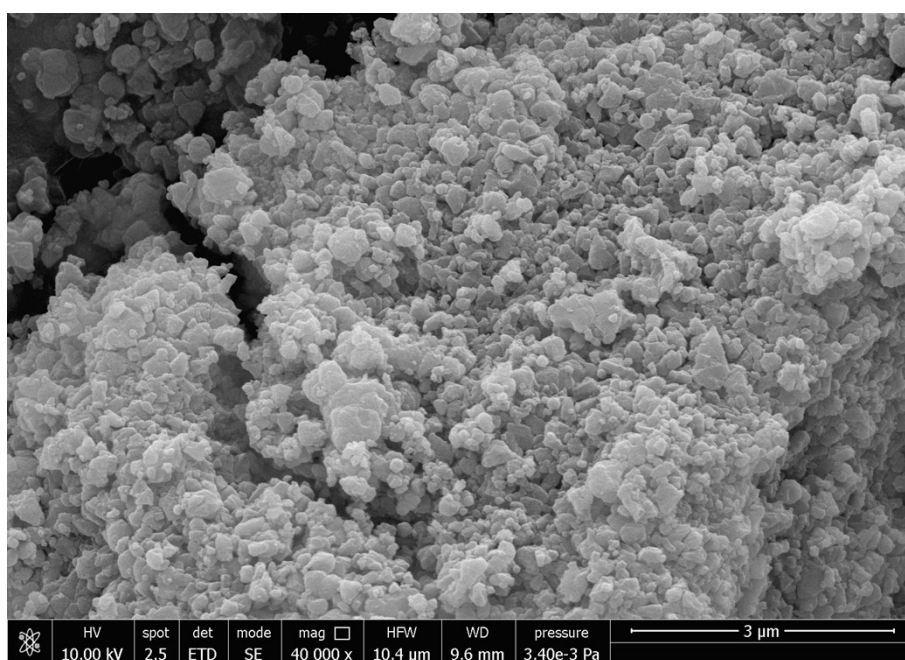

**Figure S29:** SEM micrograph of P39.

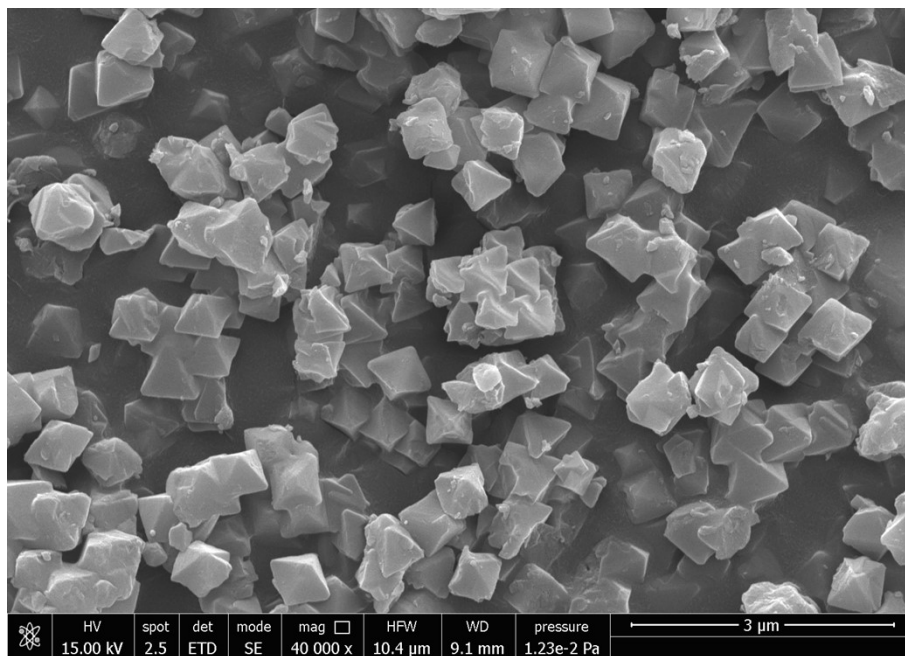

**Figure S30:** SEM micrograph of Defective\_UiO-66.

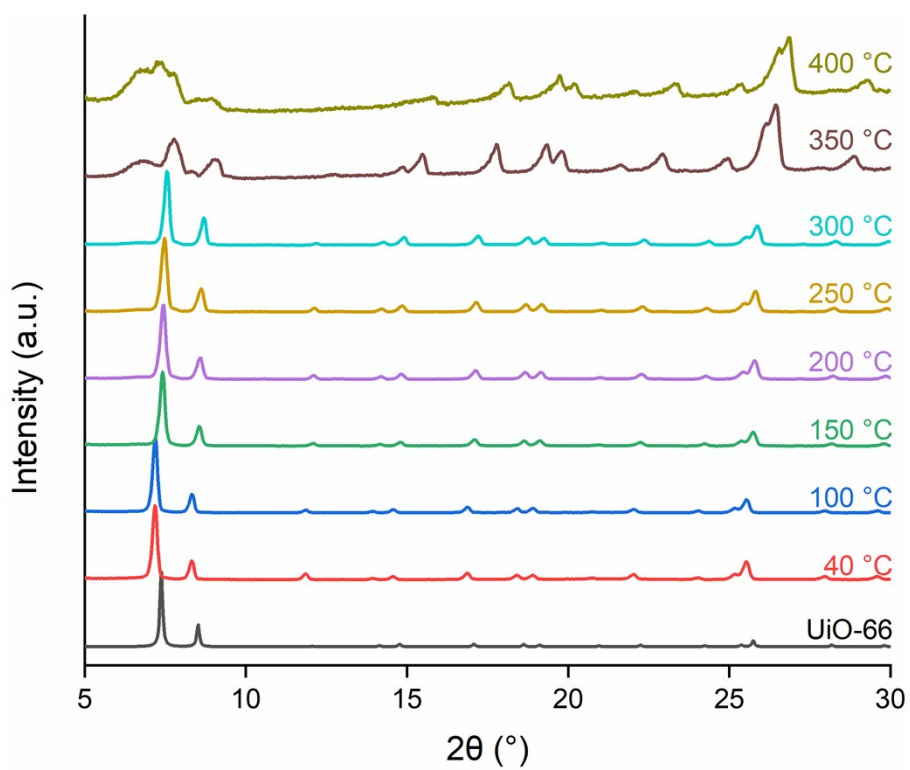

**Figure S31:** VTPXRD patterns of Defective\_UiO-66 from 40 to 400 °C

## Synthesis scale up

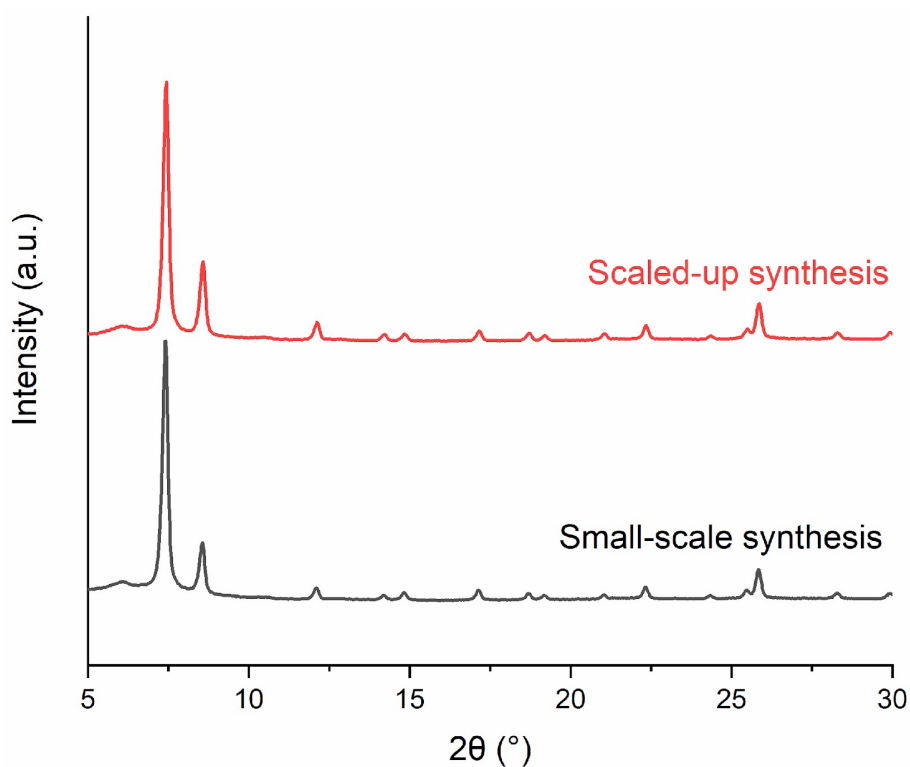

**Figure S32:** Comparison of the PXRD patterns of P39 (black) and P39\_LS (red).

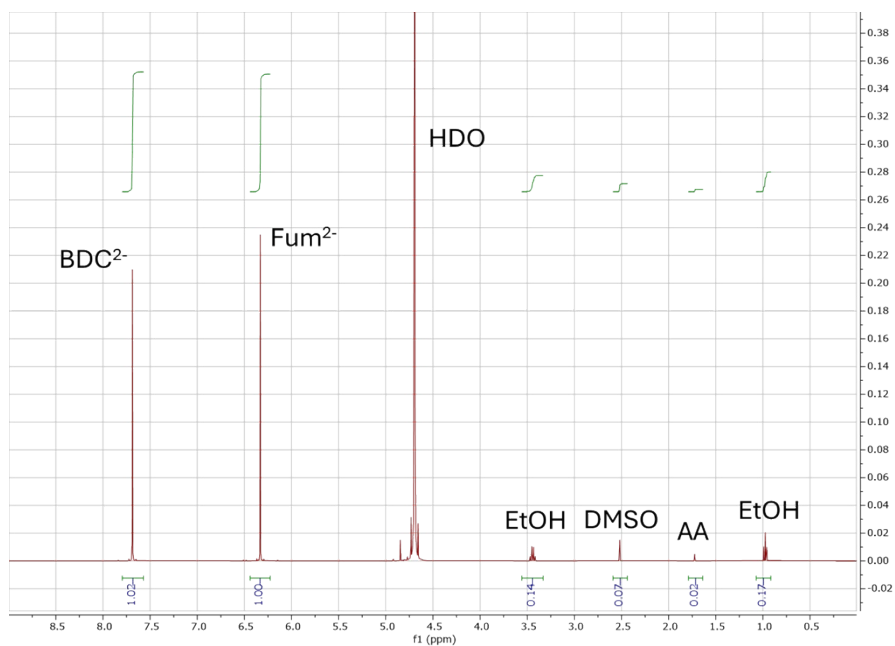

**Figure S33:** Quantitative  $^1\text{H}$ -NMR spectrum of P39\_LS (16.7 mg) digested in 1.0 mL of 1.0 M NaOH in D<sub>2</sub>O with 0.10 M fumaric acid as internal standard. The signals of BDC<sup>2-</sup> at 7.6 ppm account for four aromatic protons, therefore its integral must be divided by four to obtain the values comparable with that of fumarate (Fum<sup>2-</sup>, 1.00) at 6.3 ppm, which accounts for

only two protons. The signal of DMSO at 2.5 ppm (six protons) is not significant, proving that the washing procedure with water is effective at removing DMSO from the pores. The signal of AA at 1.7 ppm (three protons) is also not significant, indicating that AA is not retained as a defect-compensating species in the MOF. The signals of EtOH at 1.0 ppm (three protons) and 3.4 ppm (two protons) indicate that some of the solvent used for the last step of the workup is still present in the pores. Given the concentration of Fum<sup>2-</sup> is 0.10 M, the concentration of BDC<sup>2-</sup> is found to be 0.051 M, corresponding to 8.4 mg (50 wt%), whereas the concentration of EtOH is 0.009 M, corresponding to 0.4 mg (2 wt%). The chemical formula of P39 can be derived by assuming that all EtOH is physisorbed in the pores and that accounting for a EtOH/BDC<sup>2-</sup> integral ratio of 0.18, leading to the general formula Zr<sub>6</sub>O<sub>4</sub>(OH)<sub>4</sub>(BDC)<sub>6-x</sub>(OH/H<sub>2</sub>O)<sub>2x</sub>·0.18(6-x)EtOH. The value of x can be derived by imposing that the wt% of BDC<sup>2-</sup> be 50%, leading to Zr<sub>6</sub>O<sub>4</sub>(OH)<sub>4</sub>(BDC)<sub>4.90</sub>(OH/H<sub>2</sub>O)<sub>2.20</sub>·0.9EtOH is derived, which suggests a slightly lower amount of defects than P39.

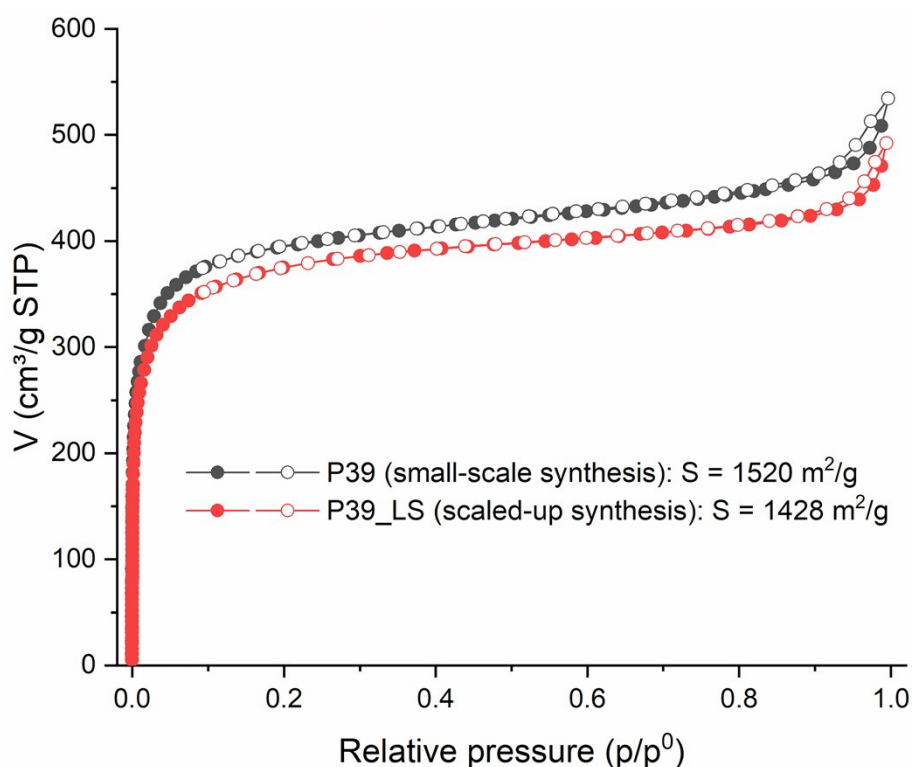

**Figure S34:** Comparison of the N<sub>2</sub> adsorption/desorption isotherms at 77 K of P39 (black) and P39\_LS (red).

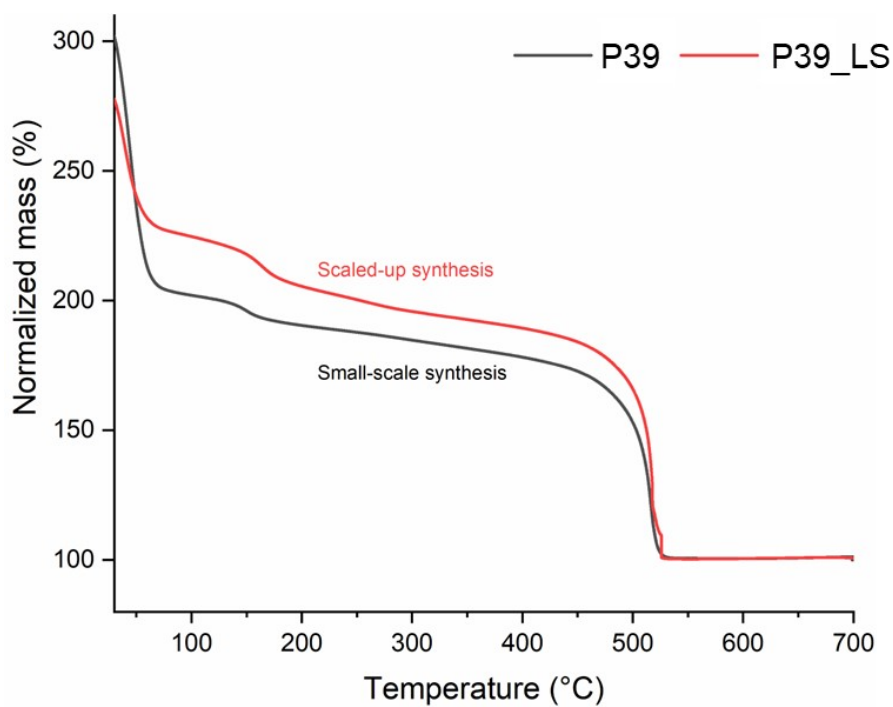

**Figure S35:** Comparison of the TG curves of P39 (black) and P39\_LS (red).

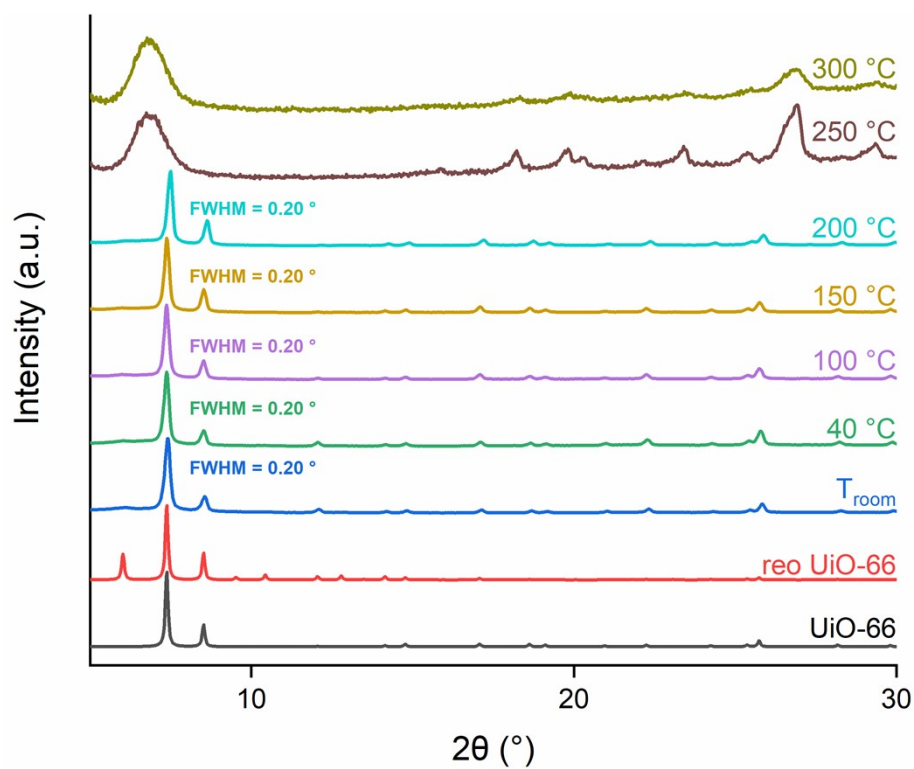

**Figure S36:** VT-PXRD patterns of P39\_LS from room temperature ( $T_{\text{room}}$ ) to 300 °C.
